# Supplementary material for: Uncoupling Protein 2 and Peroxisome Proliferator-Activated Receptor γ Gene Polymorphisms in Association with Diabetes Susceptibility in Chinese Han Population with Variant Glucose Tolerance
Source: Hindawi journal article supplement (doi:10.1155/2018/4636783), 2018-01-01
Supplement: f1 [file 4636783.f1.pdf]

**Supplementary Table 1. Hardy-Weinberg equilibrium test of loci in UCP2 and PPAR $\gamma$** 

| Gene name     | SNP number | Group                 | Observed heterozygosity | Expectation heterozygosity | <i>P</i> value |
|---------------|------------|-----------------------|-------------------------|----------------------------|----------------|
| UCP2          | rs660339   | Pre-diabetes/Diabetes | 0.523                   | 0.498                      | 0.402          |
|               |            | Normal blood glucose  | 0.520                   | 0.499                      | 0.572          |
|               | rs659366   | Pre-diabetes/Diabetes | 0.520                   | 0.499                      | 0.464          |
|               |            | Normal blood glucose  | 0.515                   | 0.500                      | 0.776          |
|               | rs649446   | Pre-diabetes/Diabetes | 0.458                   | 0.444                      | 0.638          |
|               |            | Normal blood glucose  | 0.495                   | 0.451                      | 0.208          |
|               | rs586773   | Pre-diabetes/Diabetes | 0.506                   | 0.499                      | 0.835          |
|               |            | Normal blood glucose  | 0.5                     | 0.500                      | 1              |
|               | rs34408426 | Pre-diabetes/Diabetes | 0.504                   | 0.499                      | 0.917          |
|               |            | Normal blood glucose  | 0.503                   | 0.500                      | 1              |
|               | rs7109266  | Pre-diabetes/Diabetes | 0.458                   | 0.440                      | 0.479          |
|               |            | Normal blood glucose  | 0.5                     | 0.450                      | 0.154          |
|               | rs3019463  | Pre-diabetes/Diabetes | 0.5                     | 0.499                      | 1              |
|               |            | Normal blood glucose  | 0.505                   | 0.500                      | 1              |
|               | rs591758   | Pre-diabetes/Diabetes | 0.507                   | 0.499                      | 0.834          |
|               |            | Normal blood glucose  | 0.505                   | 0.500                      | 1              |
| PPAR $\gamma$ | rs2920503  | Pre-diabetes/Diabetes | 0.407                   | 0.419                      | 0.613          |
|               |            | Normal blood glucose  | 0.404                   | 0.434                      | 0.329          |
|               | rs73813168 | Pre-diabetes/Diabetes | 0.209                   | 0.196                      | 0.285          |
|               |            | Normal blood glucose  | 0.276                   | 0.252                      | 0.263          |
|               | rs79310821 | Pre-diabetes/Diabetes | 0.484                   | 0.462                      | 0.638          |
|               |            | Normal blood glucose  | 0.408                   | 0.436                      | 0.208          |
|               | rs73021485 | Pre-diabetes/Diabetes | 0.482                   | 0.436                      | 0.575          |
|               |            | Normal blood glucose  | 0.409                   | 0.426                      | 0.415          |
|               | rs2920502  | Pre-diabetes/Diabetes | 0.449                   | 0.414                      | 0.130          |
|               |            | Normal blood glucose  | 0.416                   | 0.446                      | 0.342          |
|               | rs17029007 | Pre-diabetes/Diabetes | 0.196                   | 0.198                      | 0.790          |
|               |            | Normal blood glucose  | 0.273                   | 0.257                      | 0.580          |
|               | rs3856806  | Pre-diabetes/Diabetes | 0.359                   | 0.347                      | 0.650          |
|               |            | Normal blood glucose  | 0.293                   | 0.278                      | 0.610          |
